# Supplementary material for: Effect of multilayer structure, stacking order and external electric field on the electrical properties of few-layer boron-phosphide
Source: Royal Society of Chemistry journal article supplement (doi:10.1039/c6cp01083k), 2016-01-01

## Effect of multilayer structure, stacking order and external electric field on electrical properties of few-layer boron-phosphide

Xianping Chen,<sup>\*ab†</sup> Chunjian Tan,<sup>a†</sup> Qun Yang,<sup>a</sup> Ruishen Meng,<sup>a</sup> Qihua Liang,<sup>b</sup> Junke Jiang,<sup>b</sup> Xiang Sun,<sup>b</sup>

D.Q. Yang,<sup>a</sup> and Tianling Ren<sup>\*c</sup>

<sup>a</sup> Faculty of Electromechanical Engineering, Guilin University of Electronic Technology, 541004 Guilin, China. xianpingchen1979@126.com

<sup>b</sup> Key Laboratory of Optoelectronic Technology & Systems, Education Ministry of China, Chongqing University, Chongqing 400044, China

<sup>c</sup> Institute of Microelectronics, Tsinghua University, 100084 Beijing, China. RenTL@tsinghua.edu.cn

† These authors contributed equally to this work.

Bilayer stacking pattern

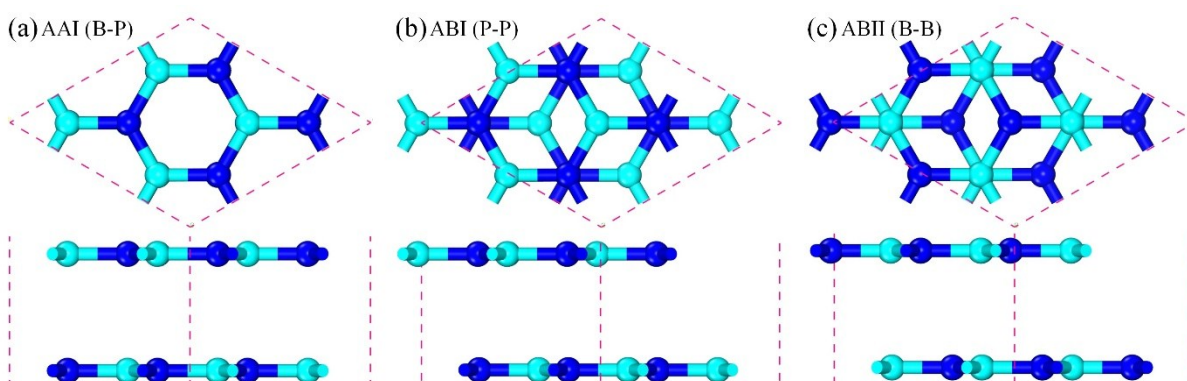

Trilayer stacking pattern

(a) AAI (P-B-P)

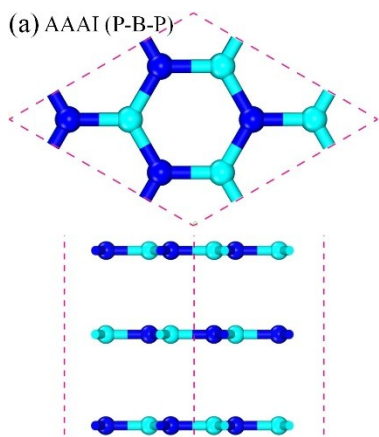

(b) AAII (P-P-B)

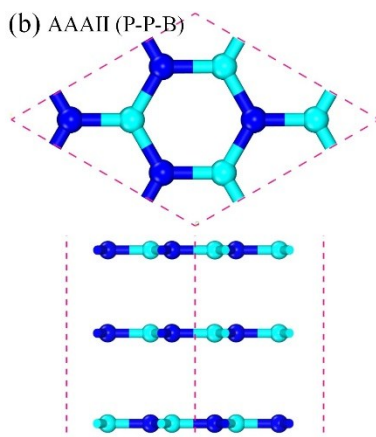

(c) AAB (B-P-P)

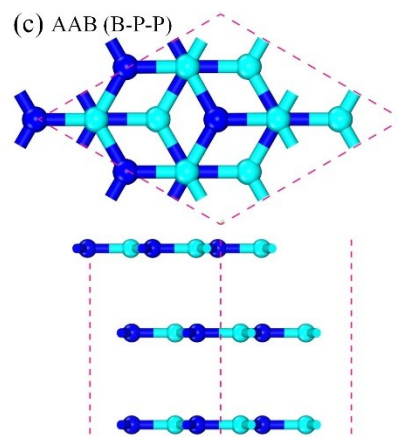

(d) AABI (P-P-P)

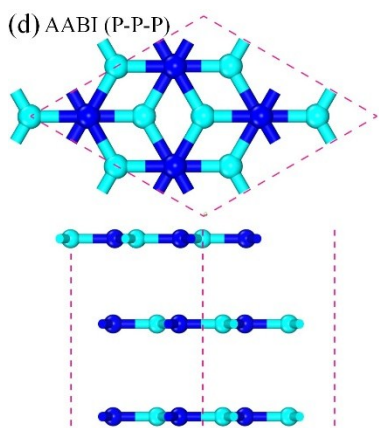

(e) ABAI (P-P-P)

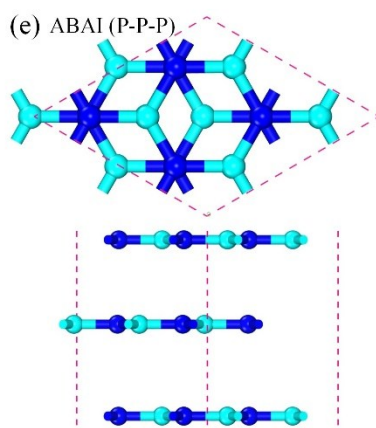

(f) ABII (B-B-B)

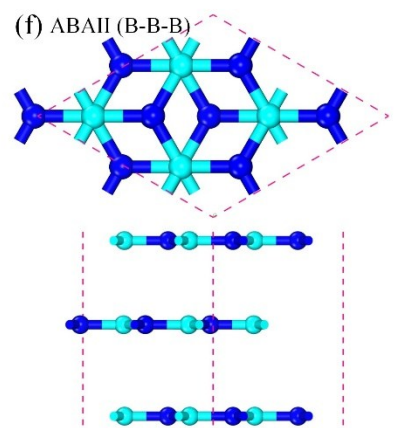

(g) ABIII (B-P-B)

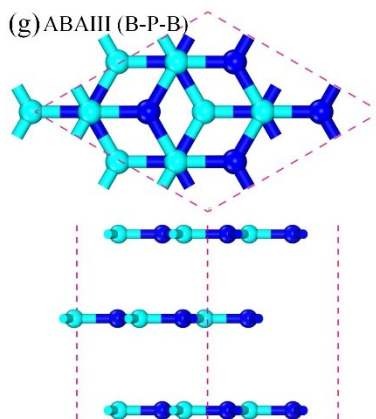

Supplement: c6cp01083k1.pdf [file c6cp01083k1.pdf]
